# Supplementary material
Source: PubMed Central journal article supplement (PMC1895578)
Supplement: blood_blood-2006-04-020263_1.pdf [file blood_blood-2006-04-020263_1.pdf]

4 h

12 h

24 h

48 h

72 h

Cell Number

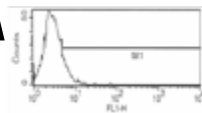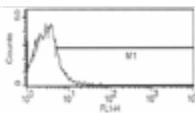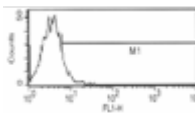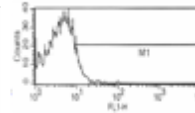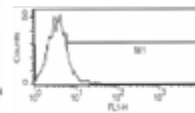**Background Control**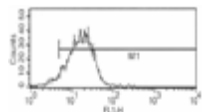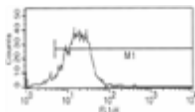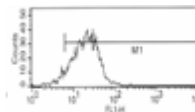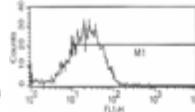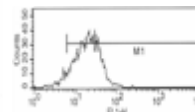**Buffer Control**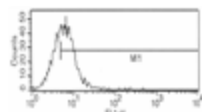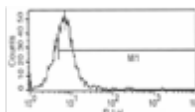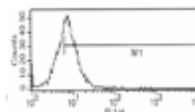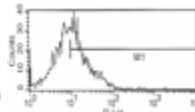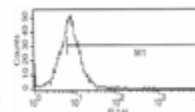**Anti-hTfR-IgG3**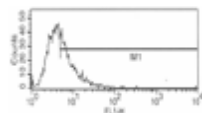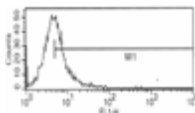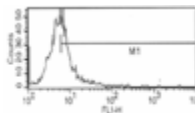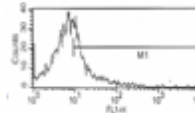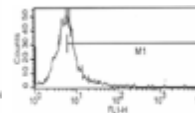**Anti-hTfR-(IgG3-Av)****Log Fluorescence Intensity**
